# Supplementary material for: Sociodemographic, Clinical, and Treatment-Related Factors Associated With Hyperglycemic Crises Among Adults With Type 1 or Type 2 Diabetes in the US From 2014 to 2020
Source: PubMed Central journal article supplement (PMC8411297; doi:10.1001/jamanetworkopen.2021.23471), 2021-09-01
Supplement: jamanetwopen-e2123471-s001.pdf [file jamanetwopen-e2123471-s001.pdf]

## Supplementary Online Content

McCoy RG, Galindo RJ, Swarna KS, et al. Sociodemographic, clinical, and treatment-related factors associated with hyperglycemic crises among adults with type 1 or type 2 diabetes in the US from 2014 to 2020. *JAMA Netw Open*. 2021;4(9):e2123471. doi:10.1001/jamanetworkopen.2021.23471

**eTable 1.** Code Sets for Included Health Conditions

**eTable 2.** Classification Scheme for Glucose-Lowering Medications

**eTable 3.** Patients With Type 2 Diabetes

**eTable 4.** Crude and Adjusted Rates of Hyperglycemic Crises Among Patients With Type 1 and Type 2 Diabetes, 2014-2020

**eTable 5.** Crude and Adjusted Rates of Hyperglycemic Crises Among Patients With Type 1 Diabetes by Prespecified Subgroup, 2014-2020

**eTable 6.** Crude and Adjusted Rates of Hyperglycemic Crises Among Patients With Type 2 Diabetes by Prespecified Subgroup, 2014-2020

**eTable 7.** Risk Factors for DKA and HHS (Examined as Independent Outcomes) Among Adults With Type 2 Diabetes, 2014-2020

This supplementary material has been provided by the authors to give readers additional information about their work.

**eTable 1. Code Sets for Included Health Conditions.** All conditions were ascertained during the baseline 12 months preceding the index date for cohort entry

| <b>Comorbidity</b>                              | <b>ICD-9 Codes</b>                                                                                                                                   | <b>ICD-10 codes</b>                                                                                                                                                                                                              | <b>Included code types</b>                                  |
|-------------------------------------------------|------------------------------------------------------------------------------------------------------------------------------------------------------|----------------------------------------------------------------------------------------------------------------------------------------------------------------------------------------------------------------------------------|-------------------------------------------------------------|
| <b>Cancer (except non-melanoma skin cancer)</b> | 14x.xx, 15x.xx, 160.x-165.x, 170.x-172.x, 174.x-176.x, 179-189.x, 190.x-195.x, 199.xx-208.xx (except 203.x1, 204.x1, 205.x1, 206.x1, 207.x1, 208.x1) | C00.x-C14.x, C15.x-C26.x, C3x.xx, C40.xx-C41.x, C43.x, C4A.xx, C45.x-C49.xx, C50.xxx, C51.x-C58, C60.x-C63.x, C64.x-C68.x, C69.xx-C72.x, C73-C76.x, C7A.xx, C80.xx-C96.x (except C90.x1, C91.x1, C92.x1, C93.x1, C94.x1, C95.x1) | All claims<br>Codes in all positions                        |
| <b>Cardiovascular disease</b>                   | 410.x, 411.x, 412, 413.x, 414.x, 427.1, 427.3x, 427.4x, 427.5, 429.2, 440.x, 441.x                                                                   | I20.x, I21.x, I22.x, I23.x, I24.x, I25.x, I46.x, I47.x, I48.x, I49.x, I70.x, I71.x                                                                                                                                               | All claims<br>Codes in all positions                        |
| <b>Cerebrovascular disease</b>                  | 430, 431, 432.x, 433.xx, 434.xx 435.x, 436, 437.x, 438.xx, V12.54                                                                                    | G45.0, G45.1, G45.2, G45.8, G45.9, G46.x, I60.xx, I61.x (except I61.0), I62.xx, I63.xxx, I65.xx, I66.xx, I67.8x (except I67.83, I67.84), I67.9, I69.xxx, Z86.73                                                                  | All claims<br>Codes in all positions                        |
| <b>Chronic obstructive pulmonary disease</b>    | 490, 491.xx, 492.x, 494.x, 496                                                                                                                       | J40, J41.x, J42, J43.x, J44.x, J47.x                                                                                                                                                                                             | All claims<br>Codes in all positions                        |
| <b>Cirrhosis</b>                                | 571.2, 571.5, 571.6                                                                                                                                  | K70.3x, K74.3, K74.4, K74.5, K74.6x                                                                                                                                                                                              | All claims<br>Codes in all positions                        |
| <b>Dementia</b>                                 | 046.1x, 290.1x, 290.2x, 290.3, 290.4x, 291.2, 292.82, 294.1x, 294.2x, 331.0, 331.1x, 331.2, 331.6, 331.82, 331.89                                    | A81.0x, F01.5x, F02.8x, F03.9x, F10.27, F10.97, F13.27, F13.97, F18.97, F19.17, F19.27, F19.97, G30.x, G31.0x, G31.1, G31.83, G31.85                                                                                             | All claims<br>Codes in all positions                        |
| <b>Depression</b>                               | 290.13, 290.21, 290.43, 296.2x, 296.3x, 296.82, 298.0, 301.12, 309.0, 309.1, 309.28, 311                                                             | F01.51, F32.x (except F32.81), F33.x, F34.8x, F43.21, F43.23                                                                                                                                                                     | All claims<br>Codes in all positions                        |
| <b>DKA</b>                                      | 250.10, 250.11, 250.12, 250.13                                                                                                                       | E10.10, E10.11, E11.10, E11.11, E13.10, E13.11                                                                                                                                                                                   | Hospital and ED claims<br>Codes in 1 <sup>st</sup> position |
| <b>HHS</b>                                      | 250.20, 250.21, 250.22, 250.23                                                                                                                       | E11.00, E11.01, E13.00, E13.01                                                                                                                                                                                                   | Hospital and ED claims<br>Codes in 1 <sup>st</sup> position |
| <b>Heart failure</b>                            | 398.91, 402.01, 402.11, 402.91, 404.01, 404.03, 404.11, 404.13, 404.91, 404.93, 428.xx                                                               | I09.81, I11.0, I13.0, I13.2, I50.xx                                                                                                                                                                                              | All claims<br>Codes in all positions                        |
| <b>Hypoglycemia</b>                             | 251.0, 251.1, 251.2, 962.3, 250.8x (for 250.8x: if no concurrent 259.8, 272.7, 681.xx, 682.xx, 686.9x,                                               | E10.641, E10.649, E11.641, E11.649, E13.641, E13.649, E16.0, E16.1, E16.2, T38.3X1A, T38.3X1D, T38.3X1S,                                                                                                                         | Hospital and ED claims<br>Codes in 1 <sup>st</sup> position |

| <b>Comorbidity</b>                 | <b>ICD-9 Codes</b>                                                                                                                   | <b>ICD-10 codes</b>                                                                                                                                                                                                                  | <b>Included code types</b>           |
|------------------------------------|--------------------------------------------------------------------------------------------------------------------------------------|--------------------------------------------------------------------------------------------------------------------------------------------------------------------------------------------------------------------------------------|--------------------------------------|
|                                    | 707.1x-707.2x, 707.8, 707.9, 709.3, 730.0x-730.2x, 731.8)                                                                            | T38.3X2A, T38.3X2D, T38.3X2S, T38.3X3A, T38.3X3D, T38.3X3S, T38.3X4A, T38.3X4D, T38.3X4S, T38.3X5A, T38.3X5D, T38.3X5S                                                                                                               |                                      |
| <b>Hypertension</b>                | 401.x, 402.x, 403.x, 404.x, 405.x                                                                                                    | I11.x, I12.x, I13.x, I15.x, I16.x, I10                                                                                                                                                                                               | All claims<br>Codes in all positions |
| <b>Nephropathy</b>                 | 593.9, 586, 250.4x, 249.4x, 580.x, 581.x, 582.x, 583.x, 585.x                                                                        | E08.21, E08.22, E08.29, E09.21, E09.22, E09.29, E10.21, E10.22, E10.29, E11.21, E11.22, E11.29, E13.21, E13.22, E13.29, N19, N00.x, N03.x, N04.x, N05.x, N18.x                                                                       | All claims<br>Codes in all positions |
| <b>Neuropathy</b>                  | 357.2, 337.1, 356.9, 358.1, 458.0, 536.3, 564.5, 596.54, 713.5, 951.0, 951.1, 951.3, 250.6x, 249.6x, 337.0x, 354.x, 355.x            | G90.09, G90.8, G90.9, G99.0, G60.9, G73.3, G90.01, I95.1, K31.84, K59.1, N31.9, E08.4x, E09.4x, E10.4x, E11.4x, E13.4x, G56.x, G57.x, H49.x, M14.6x, S04.x                                                                           | All claims<br>Codes in all positions |
| <b>Peripheral vascular disease</b> | 442.3, 440.21, 443.81, 443.9, 892.1, 040.0, 444.22, 785.4, 250.7x, 249.7, 707.1x                                                     | E08.51, E09.51, E10.51, E11.51, E13.51, E08.59, E09.59, E10.59, E11.59, E13.59, E08.621, E09.621, E10.621, E11.621, E13.621, I72.4, I73.89, I73.9, A48.0, I74.3, I96, E08.52, E09.52, E10.52, E11.52, E13.52, I70.21x, S91.3x, L97.x | All claims<br>Codes in all positions |
| <b>Retinopathy</b>                 | 362.01, 362.03, 362.04, 362.05, 362.06, 362.07, 362.53, 362.81, 362.82, 362.83, 362.02, 379.23, 250.5x, 249.5x, 362.1x, 361.x, 369.x | H35.9, E08.3x, E09.3x, E10.3x, E11.3x, E13.3x, H35.0x, H35.35x, H35.6x, H35.8x, H33.x, H54.x, H43.1x                                                                                                                                 | All claims<br>Codes in all positions |

Abbreviations: DKA, diabetic ketoacidosis; ED, emergency department; HHS, hyperglycemic hyperosmolar state.

**eTable 2. Classification Scheme for Glucose-Lowering Medications**

| <b>Medication class</b>                           | <b>Included agents</b>                                                                |
|---------------------------------------------------|---------------------------------------------------------------------------------------|
| <b>Insulin: Basal</b>                             | NPH/isophane<br>Determir<br>Glargine<br>Degludec                                      |
| <b>Insulin: Bolus</b>                             | Regular<br>Aspart<br>Lispro<br>Glulisine<br>Inhaled powder insulin                    |
| <b>Sulfonylureas</b>                              | Glimepiride<br>Glipizide<br>Glyburide                                                 |
| <b>Biguanides</b>                                 | Metformin                                                                             |
| <b>GLP-1 receptor agonists</b>                    | Exenatide<br>Liraglutide<br>Albiglutide<br>Dulaglutide<br>Lixisenatide<br>Semaglutide |
| <b>SGLT2 inhibitors</b>                           | Canagliflozin<br>Empagliflozin<br>Dapagliflozin<br>Ertugliflozin                      |
| <b>DPP-4 inhibitors</b>                           | Sitagliptin<br>Saxagliptin<br>Linagliptin<br>Alogliptin                               |
| <b>Glitazones</b>                                 | Pioglitazone<br>Rosiglitazone                                                         |
| <b>Glinides</b>                                   | Nateglinide<br>Repaglinide                                                            |
| <b>Amylin analogs</b>                             | Pramlintide                                                                           |
| <b><math>\alpha</math>-Glucosidase inhibitors</b> | Acarbose<br>Miglitol                                                                  |

**eTable 3. Patients With Type 2 Diabetes.** Baseline sociodemographic, clinical, and diabetes treatment characteristics of included adults with type 2 diabetes, overall and subset by whether they experienced at least one episode of hyperglycemic crisis during the follow-up period. <sup>a</sup> There were 4,264 patients who experienced at least one episode of DKA and 202 patients who experienced at least one episode of DKA and at least one episode of HHS during the observation period. Because of the small sample size of patients who experienced both DKA and HHS events, and our inability to present sample sizes smaller than 11 (as would be the case in many cells for this small group), the group with both types of events was combined with the group experiencing DKA only.

|                                       | Total            | No DKA/HHS       | DKA ± HHS <sup>a</sup> | HHS           | p-value |
|---------------------------------------|------------------|------------------|------------------------|---------------|---------|
| <b>Number of patients</b>             | 796,382          | 790,587          | 4,466                  | 1,329         |         |
| <b>Sociodemographic variables</b>     |                  |                  |                        |               |         |
| <b>Age, years, mean (SD)</b>          | 65.63 (11.79)    | 65.66 (11.78)    | 60.54 (13.95)          | 66.81 (11.53) | <0.001  |
| <b>Age, N (%)</b>                     |                  |                  |                        |               | <0.001  |
| 18-44 years                           | 42,356 (5.32%)   | 41,717 (5.28%)   | 585 (13.10%)           | 54 (4.06%)    |         |
| 45-64 years                           | 281,738 (35.38%) | 279,406 (35.34%) | 1,902 (42.59%)         | 430 (32.36%)  |         |
| 65-74 years                           | 286,441 (35.97%) | 284,676 (36.01%) | 1,275 (28.55%)         | 490 (36.87%)  |         |
| ≥75 years                             | 185,847 (23.34%) | 184,788 (23.37%) | 704 (15.76%)           | 355 (26.71%)  |         |
| <b>Sex, N (%)</b>                     |                  |                  |                        |               |         |
| Female                                | 400,346 (50.27%) | 397,272 (50.25%) | 2,380 (53.29%)         | 694 (52.22%)  |         |
| Male                                  | 396,036 (49.73%) | 393,315 (49.75%) | 2,086 (46.71%)         | 635 (47.78%)  |         |
| <b>Race/ethnicity, N (%)</b>          |                  |                  |                        |               | <0.001  |
| White                                 | 433,623 (54.45%) | 430,499 (54.45%) | 2,502 (56.02%)         | 622 (46.80%)  |         |
| Black                                 | 141,999 (17.83%) | 140,476 (17.77%) | 1,088 (24.36%)         | 435 (32.73%)  |         |
| Hispanic                              | 133,664 (16.78%) | 132,901 (16.81%) | 592 (13.26%)           | 171 (12.87%)  |         |
| Asian                                 | 40,971 (5.14%)   | 40,836 (5.17%)   | 93 (2.08%)             | 42 (3.16%)    |         |
| Other/unknown                         | 46,125 (5.79%)   | 45,875 (5.80%)   | 191 (4.28%)            | 59 (4.44%)    |         |
| <b>Annual household income, N (%)</b> |                  |                  |                        |               | <0.001  |
| <\$40,000                             | 243,621 (30.59%) | 241,339 (30.53%) | 1,647 (36.88%)         | 635 (47.78%)  |         |
| \$40,000-\$74,999                     | 222,612 (27.95%) | 220,975 (27.95%) | 1,284 (28.75%)         | 353 (26.56%)  |         |
| \$75,000-\$124,999                    | 171,737 (21.56%) | 170,747 (21.60%) | 815 (18.25%)           | 175 (13.17%)  |         |
| \$125,000-\$199,999                   | 64,332 (8.08%)   | 64,057 (8.10%)   | 239 (5.35%)            | 36 (2.71%)    |         |
| ≥\$200,000                            | 28,576 (3.59%)   | 28,449 (3.60%)   | 108 (2.42%)            | 19 (1.43%)    |         |
| Unknown                               | 65,504 (8.23%)   | 65,020 (8.22%)   | 373 (8.35%)            | 111 (8.35%)   |         |
| <b>Index year, N (%)</b>              |                  |                  |                        |               | <0.001  |
| 2014                                  | 152,519 (19.15%) | 151,000 (19.10%) | 1,193 (26.71%)         | 326 (24.53%)  |         |
| 2015                                  | 117,351 (14.74%) | 116,318 (14.71%) | 788 (17.64%)           | 245 (18.43%)  |         |
| 2016                                  | 104,538 (13.13%) | 103,777 (13.13%) | 603 (13.50%)           | 158 (11.89%)  |         |
| 2017                                  | 137,597 (17.28%) | 136,555 (17.27%) | 767 (17.17%)           | 275 (20.69%)  |         |
| 2018                                  | 142,231 (17.86%) | 141,433 (17.89%) | 619 (13.86%)           | 179 (13.47%)  |         |
| 2019                                  | 142,146 (17.85%) | 141,504 (17.90%) | 496 (11.11%)           | 146 (10.99%)  |         |

|                                                                                  | Total            | No DKA/HHS       | DKA ± HHS <sup>a</sup> | HHS            | p-value |
|----------------------------------------------------------------------------------|------------------|------------------|------------------------|----------------|---------|
| <b>U.S. census region, N (%)</b>                                                 |                  |                  |                        |                | <0.001  |
| Midwest                                                                          | 144,126 (18.10%) | 143,046 (18.09%) | 829 (18.56%)           | 251 (18.89%)   |         |
| Northeast                                                                        | 120,946 (15.19%) | 120,193 (15.20%) | 538 (12.05%)           | 215 (16.18%)   |         |
| South                                                                            | 446,286 (56.04%) | 442,879 (56.02%) | 2,643 (59.18%)         | 764 (57.49%)   |         |
| West/unknown                                                                     | 85,024 (10.68%)  | 84,469 (10.68%)  | 456 (10.21%)           | 99 (7.45%)     |         |
| <b>Clinical variables</b>                                                        |                  |                  |                        |                |         |
| <b>Comorbidities, N (%)</b>                                                      |                  |                  |                        |                |         |
| Hyperglycemic crisis                                                             | 2,646 (0.33%)    | 2,063 (0.26%)    | 510 (11.42%)           | 73 (5.49%)     | <0.001  |
| Severe hypoglycemia                                                              | 6,727 (0.84%)    | 6,342 (0.80%)    | 305 (6.83%)            | 80 (6.02%)     | <0.001  |
| Retinopathy                                                                      | 123,148 (15.46%) | 121,733 (15.40%) | 1,093 (24.47%)         | 322 (24.23%)   | <0.001  |
| Neuropathy                                                                       | 218,245 (27.40%) | 215,790 (27.29%) | 1,883 (42.16%)         | 572 (43.04%)   | <0.001  |
| Nephropathy                                                                      | 186,900 (23.47%) | 184,944 (23.39%) | 1,382 (30.94%)         | 574 (43.19%)   | <0.001  |
| Cardiovascular disease                                                           | 259,985 (32.65%) | 257,875 (32.62%) | 1,527 (34.19%)         | 583 (43.87%)   | <0.001  |
| Cerebrovascular disease                                                          | 92,517 (11.62%)  | 91,584 (11.58%)  | 643 (14.40%)           | 290 (21.82%)   | <0.001  |
| Peripheral vascular disease                                                      | 132,101 (16.59%) | 130,770 (16.54%) | 960 (21.50%)           | 371 (27.92%)   | <0.001  |
| Heart failure                                                                    | 85,846 (10.78%)  | 84,889 (10.74%)  | 636 (14.24%)           | 321 (24.15%)   | <0.001  |
| Dementia                                                                         | 24,052 (3.02%)   | 23,788 (3.01%)   | 176 (3.94%)            | 88 (6.62%)     | <0.001  |
| Hypertension                                                                     | 686,124 (86.16%) | 681,196 (86.16%) | 3,680 (82.40%)         | 1,248 (93.91%) | <0.001  |
| Depression                                                                       | 99,487 (12.49%)  | 98,313 (12.44%)  | 918 (20.56%)           | 256 (19.26%)   | <0.001  |
| COPD                                                                             | 114,033 (14.32%) | 112,987 (14.29%) | 727 (16.28%)           | 319 (24.00%)   | <0.001  |
| Cancer                                                                           | 71,797 (9.02%)   | 71,287 (9.02%)   | 365 (8.17%)            | 145 (10.91%)   | 0.008   |
| Cirrhosis                                                                        | 8,952 (1.12%)    | 8,834 (1.12%)    | 77 (1.72%)             | 41 (3.09%)     | <0.001  |
| <b>Treatment variables</b>                                                       |                  |                  |                        |                |         |
| <b>Hemoglobin A<sub>1c</sub>, %, mean (SD)</b>                                   | 7.36 (1.63)      | 7.34 (1.61)      | 9.37 (2.33)            | 8.91 (2.42)    | <0.001  |
| <b>Hemoglobin A<sub>1c</sub>, N (%)</b>                                          |                  |                  |                        |                | <0.001  |
| ≤5.6%                                                                            | 46,822 (5.88%)   | 46,736 (5.91%)   | 57 (1.28%)             | 29 (2.18%)     |         |
| 5.7% – 6.4%                                                                      | 217,748 (27.34%) | 217,308 (27.49%) | 288 (6.45%)            | 152 (11.44%)   |         |
| 6.5% – 6.9%                                                                      | 144,631 (18.16%) | 144,177 (18.24%) | 317 (7.10%)            | 137 (10.31%)   |         |
| 7.0% – 7.9%                                                                      | 182,928 (22.97%) | 181,943 (23.01%) | 729 (16.32%)           | 256 (19.26%)   |         |
| 8.0% – 8.9%                                                                      | 90,804 (11.40%)  | 89,817 (11.36%)  | 800 (17.91%)           | 187 (14.07%)   |         |
| 9.0% – 9.9%                                                                      | 49,029 (6.16%)   | 48,185 (6.09%)   | 677 (15.16%)           | 167 (12.57%)   |         |
| ≥10%                                                                             | 64,420 (8.09%)   | 62,421 (7.90%)   | 1,598 (35.78%)         | 401 (30.17%)   |         |
| <b>Fills for glucose-lowering medication in the 120 days prior to index date</b> |                  |                  |                        |                |         |
| <b>No fills</b>                                                                  | 184,079 (23.11%) | 183,138 (23.16%) | 709 (15.88%)           | 232 (17.46%)   |         |
| <b>Insulin fills, N (%)</b>                                                      |                  |                  |                        |                | <0.001  |
| Not treated with insulin                                                         | 632,323 (79.40%) | 629,706 (79.65%) | 1,924 (43.08%)         | 693 (52.14%)   |         |
| Basal only (no bolus)                                                            | 89,977 (11.30%)  | 88,724 (11.22%)  | 958 (21.45%)           | 295 (22.20%)   |         |

|                                                        | <b>Total</b>     | <b>No DKA/HHS</b> | <b>DKA ± HHS<sup>a</sup></b> | <b>HHS</b>   | <b>p-value</b> |
|--------------------------------------------------------|------------------|-------------------|------------------------------|--------------|----------------|
| Bolus (± basal)                                        | 74,082 (9.30%)   | 72,157 (9.13%)    | 1,584 (35.47%)               | 341 (25.66%) |                |
| <b>Non-insulin glucose-lowering medications, N (%)</b> |                  |                   |                              |              |                |
| Sulfonylurea                                           | 203,122 (25.51%) | 201,852 (25.53%)  | 930 (20.82%)                 | 340 (25.58%) | <0.001         |
| Metformin                                              | 429,036 (53.87%) | 426,884 (54.00%)  | 1,641 (36.74%)               | 511 (38.45%) | <0.001         |
| SGLT2 inhibitor                                        | 40,247 (5.05%)   | 39,933 (5.05%)    | 280 (6.27%)                  | 34 (2.56%)   | <0.001         |
| GLP-1 receptor agonist                                 | 45,950 (5.77%)   | 45,632 (5.77%)    | 248 (5.55%)                  | 70 (5.27%)   | 0.60           |
| DPP-4 inhibitor                                        | 96,962 (12.18%)  | 96,377 (12.19%)   | 426 (9.54%)                  | 159 (11.96%) | <0.001         |
| Thiazolidinedione                                      | 38,668 (4.86%)   | 38,439 (4.86%)    | 182 (4.08%)                  | 47 (3.54%)   | 0.004          |
| Other glucose-lowering medication                      | 7,685 (0.96%)    | 7,629 (0.96%)     | 41 (0.92%)                   | 15 (1.13%)   | 0.79           |

Abbreviations: COPD, chronic obstructive pulmonary disease; DKA, diabetic ketoacidosis; HHS, hyperglycemic hyperosmolar state.

**eTable 4. Crude and Adjusted Rates of Hyperglycemic Crises Among Patients With Type 1 and Type 2 Diabetes, 2014-2020.** Rates adjusted for age (during event), sex, race/ethnicity, U.S. region, and year.

| Year  | <u>Type 1 Diabetes</u>        |                                  | <u>Type 2 Diabetes</u>        |                                  |
|-------|-------------------------------|----------------------------------|-------------------------------|----------------------------------|
|       | <b>Crude</b><br>N per 1000 PY | <b>Adjusted</b><br>N per 1000 PY | <b>Crude</b><br>N per 1000 PY | <b>Adjusted</b><br>N per 1000 PY |
| 2014  | 41.75                         | 43.30 (33.37, 53.24)             | 4.79                          | 4.27 (3.66, 4.88)                |
| 2015  | 47.3                          | 49.07 (40.24, 57.91)             | 4.00                          | 3.77 (3.40, 4.13)                |
| 2016  | 48.14                         | 49.80 (42.59, 57.01)             | 3.96                          | 3.81 (3.46, 4.15)                |
| 2017  | 51.26                         | 53.92 (44.62, 63.21)             | 3.89                          | 3.95 (3.64, 4.25)                |
| 2018  | 53.43                         | 56.77 (48.45, 65.10)             | 3.81                          | 4.02 (3.76, 4.29)                |
| 2019  | 60.14                         | 61.36 (52.90, 69.82)             | 3.96                          | 4.29 (4.02, 4.56)                |
| 2020  | 43.52                         | 46.27 (38.59, 53.95)             | 3.73                          | 4.12 (3.86, 4.38)                |
| Total | 50.62                         | 52.69 (48.26, 57.12)             | 3.70                          | 4.04 (3.88, 4.21)                |

Abbreviations: DKA, diabetic ketoacidosis; HHS, hyperglycemic hyperosmolar state; PY, person-years



**eTable 5. Crude and Adjusted Rates of Hyperglycemic Crises Among Patients With Type 1 Diabetes by Prespecified Subgroup, 2014-2020.** These data were used to create Figure 1 in the manuscript. Rates adjusted for age (at index date), sex, race/ethnicity, U.S. region.

|                                | <b>Crude</b><br>N per 1000 PY | <b>Adjusted</b><br>N per 1000 PY |
|--------------------------------|-------------------------------|----------------------------------|
| <b>Age group</b>               |                               |                                  |
| 18 - 44 years                  | 66.27                         | 77.57 (68.41, 86.72)             |
| 45 - 64 years                  | 39.19                         | 43.54 (36.98, 50.09)             |
| 65 - 74 years                  | 36.68                         | 38.82 (28.36, 49.27)             |
| ≥75 years                      | 45.60                         | 55.64 (38.13, 73.16)             |
| <b>Gender</b>                  |                               |                                  |
| Female                         | 62.06                         | 74.91 (66.07, 83.73)             |
| Male                           | 39.57                         | 44.04 (38.59, 49.49)             |
| <b>Race/ethnicity</b>          |                               |                                  |
| White                          | 45.69                         | 53.16 (47.69, 58.63)             |
| Black                          | 78.83                         | 96.62 (69.44, 123.81)            |
| Hispanic                       | 56.06                         | 58.93 (45.24, 72.61)             |
| Asian                          | 60.34                         | 66.07 (31.14, 100.99)            |
| <b>Annual household income</b> |                               |                                  |
| <\$40,000                      | 84.73                         | 101.52 (82.31, 120.73)           |
| \$40,000-\$74,999              | 55.66                         | 65.04 (54.12, 75.96)             |
| \$75,000-\$124,999             | 46.06                         | 52.97 (43.94, 62.01)             |
| \$125,000-\$199,999            | 34.42                         | 36.22 (28.43, 44.01)             |
| ≥\$200,000                     | 25.43                         | 26.25 (19.75, 32.75)             |

Abbreviations: DKA, diabetic ketoacidosis; HHS, hyperglycemic hyperosmolar state; PY, person-years.

**eTable 6. Crude and Adjusted Rates of Hyperglycemic Crises Among Patients With Type 2 Diabetes by Prespecified Subgroup, 2014-2020.** These data were used to create Figure 2 in the manuscript. Rates adjusted for age (at index date), sex, race/ethnicity, U.S. region.

|                                | <b>Crude</b><br>N per 1000 PY | <b>Adjusted</b><br>N per 1000 PY |
|--------------------------------|-------------------------------|----------------------------------|
| <b>Age group</b>               |                               |                                  |
| 18 - 44 years                  | 12.7                          | 13.91 (11.82, 16.00)             |
| 45 - 64 years                  | 5.12                          | 5.28 (4.96, 5.60)                |
| 65 - 74 years                  | 2.79                          | 2.97 (2.79, 3.14)                |
| ≥75 years                      | 2.47                          | 2.70 (2.49, 2.90)                |
| <b>Gender</b>                  |                               |                                  |
| Female                         | 4.09                          | 4.55 (4.31, 4.79)                |
| Male                           | 3.72                          | 4.04 (3.80, 4.27)                |
| <b>Race/ethnicity</b>          |                               |                                  |
| White                          | 3.73                          | 4.15 (3.93, 4.38)                |
| Black                          | 5.80                          | 6.34 (5.87, 6.81)                |
| Hispanic                       | 3.21                          | 3.26 (2.91, 3.60)                |
| Asian                          | 1.44                          | 1.71 (1.31, 2.11)                |
| <b>Annual household income</b> |                               |                                  |
| <\$40,000                      | 5.04                          | 5.78 (5.40, 6.17)                |
| \$40,000-\$74,999              | 3.65                          | 4.02 (3.75, 4.29)                |
| \$75,000-\$124,999             | 3.05                          | 3.11 (2.83, 3.40)                |
| \$125,000-\$199,999            | 2.20                          | 2.19 (1.80, 2.58)                |
| ≥\$200,000                     | 2.36                          | 2.23 (1.70, 2.79)                |
| <b>Insulin regimen</b>         |                               |                                  |
| No insulin                     | 1.87                          | 2.00 (1.87, 2.08)                |
| Basal insulin only             | 7.79                          | 8.35 (7.69, 9.01)                |
| Bolus ± basal insulin          | 17.3                          | 17.73 (16.53, 18.93)             |

Abbreviations: DKA, diabetic ketoacidosis; HHS, hyperglycemic hyperosmolar state; PY, person-years.

**eTable 7. Risk Factors for DKA and HHS (Examined as Independent Outcomes) Among Adults With Type 2 Diabetes, 2014-2020**

|                                | DKA                  |         | HHS               |         |
|--------------------------------|----------------------|---------|-------------------|---------|
|                                | IRR (95% CI)         | P-value | IRR (95% CI)      | P-value |
| <b>Age, years</b>              |                      |         |                   |         |
| 18-44                          | Ref                  |         | Ref               |         |
| 45-64                          | 0.54 (0.48, 0.60)    | <0.001  | 0.95 (0.73, 1.24) | 0.73    |
| 65-74                          | 0.39 (0.34, 0.45)    | <0.001  | 0.89 (0.67, 1.17) | 0.40    |
| ≥75                            | 0.35 (0.30, 0.41)    | <0.001  | 0.92 (0.69, 1.23) | 0.57    |
| <b>Gender</b>                  |                      |         |                   |         |
| Female                         | Ref                  |         | Ref               |         |
| Male                           | 0.95 (0.89, 1.03)    | 0.19    | 1.17 (1.04, 1.31) | 0.008   |
| <b>Race/Ethnicity</b>          |                      |         |                   |         |
| White                          |                      |         |                   |         |
| Black                          | 1.04 (0.95, 1.15)    | 0.37    | 1.59 (1.40, 1.81) | <0.001  |
| Hispanic                       | 0.65 (0.58, 0.73)    | <0.001  | 0.80 (0.67, 0.95) | 0.01    |
| Asian                          | 0.55 (0.42, 0.71)    | <0.001  | 0.99 (0.69, 1.42) | 0.95    |
| Other/unknown                  | 0.82 (0.67, 1.00)    | 0.05    | 1.01 (0.73, 1.41) | 0.94    |
| <b>U.S. census region</b>      |                      |         |                   |         |
| Midwest                        | Ref                  |         | Ref               |         |
| Northeast                      | 0.87 (0.77, 0.99)    | 0.04    | 1.07 (0.89, 1.30) | 0.46    |
| South                          | 1.04 (0.94, 1.14)    | 0.44    | 0.94 (0.82, 1.09) | 0.44    |
| West/unknown                   | 1.03 (0.90, 1.19)    | 0.66    | 0.88 (0.69, 1.12) | 0.29    |
| <b>Annual household income</b> |                      |         |                   |         |
| <\$40,000                      | Ref                  |         | Ref               |         |
| \$40,000-\$74,999              | 0.90 (0.83, 0.99)    | 0.03    | 0.70 (0.61, 0.81) | <0.001  |
| \$75,000-\$124,999             | 0.80 (0.72, 0.89)    | <0.001  | 0.54 (0.45, 0.64) | <0.001  |
| \$125,000-\$199,999            | 0.66 (0.56, 0.78)    | <0.001  | 0.31 (0.23, 0.44) | <0.001  |
| ≥\$200,000                     | 0.78 (0.62, 0.99)    | 0.04    | 0.42 (0.26, 0.65) | <0.001  |
| Unknown                        | 1.06 (0.91, 1.23)    | 0.48    | 0.96 (0.76, 1.20) | 0.71    |
| <b>Index year</b>              |                      |         |                   |         |
| 2014                           | Ref                  |         | Ref               |         |
| 2015                           | 0.90 (0.81, 1.00)    | 0.05    | 1.03 (0.88, 1.22) | 0.70    |
| 2016                           | 0.93 (0.82, 1.05)    | 0.24    | 0.92 (0.76, 1.11) | 0.38    |
| 2017                           | 0.92 (0.82, 1.03)    | 0.15    | 1.18 (1.01, 1.40) | 0.04    |
| 2018                           | 1.00 (0.89, 1.13)    | 0.95    | 0.96 (0.80, 1.16) | 0.68    |
| 2019                           | 1.05 (0.92, 1.20)    | 0.48    | 1.02 (0.83, 1.26) | 0.86    |
| <b>Comorbidities</b>           |                      |         |                   |         |
| Hyperglycemic Crisis           | 20.32 (17.31, 23.86) | <0.001  | 7.18 (5.68, 9.06) | <0.001  |
| Severe hypoglycemia            | 4.49 (3.77, 5.35)    | <0.001  | 3.26 (2.53, 4.20) | <0.001  |
| Retinopathy                    | 1.34 (1.22, 1.47)    | <0.001  | 1.01 (0.97, 1.26) | 0.15    |
| Nephropathy                    | 1.29 (1.19, 1.40)    | <0.001  | 1.19 (1.06, 1.34) | 0.004   |
| Neuropathy                     | 1.12 (1.03, 1.23)    | 0.009   | 1.59 (1.40, 1.80) | <0.0001 |
| Cardiovascular disease         | 0.92 (0.84, 1.00)    | 0.05    | 1.00 (0.88, 1.14) | 1.00    |
| Cerebrovascular disease        | 1.12 (1.00, 1.26)    | 0.06    | 1.30 (1.12, 1.50) | <0.001  |
| Peripheral vascular disease    | 1.06 (0.96, 1.16)    | 0.28    | 1.13 (0.99, 1.30) | 0.08    |
| Heart failure                  | 1.01 (0.90, 1.14)    | 0.89    | 1.41 (1.21, 1.65) | <0.001  |
| Dementia                       | 1.39 (1.14, 1.70)    | 0.001   | 1.57 (1.22, 2.01) | <0.001  |
| Hypertension                   | 0.74 (0.67, 0.82)    | <0.001  | 1.60 (1.29, 1.98) | <0.001  |
| Depression                     | 1.48 (1.34, 1.63)    | <0.001  | 1.40 (1.21, 1.62) | <0.001  |
| COPD                           | 1.03 (0.93, 1.15)    | 0.53    | 1.35 (1.18, 1.55) | <0.001  |
| Cancer                         | 1.12 (0.98, 1.27)    | 0.09    | 1.22 (1.03, 1.46) | 0.02    |
| Cirrhosis                      | 1.47 (1.08, 2.01)    | 0.02    | 2.71 (1.96, 3.74) | <0.001  |

|                                  |                   |        |                   |        |
|----------------------------------|-------------------|--------|-------------------|--------|
| <b>Hemoglobin A<sub>1c</sub></b> |                   |        |                   |        |
| ≤5.6%                            | 0.54 (0.39, 0.75) | <0.001 | 0.59 (0.40, 0.87) | 0.008  |
| 5.7% – 6.4%                      | 0.63 (0.53, 0.75) | <0.001 | 0.76 (0.60, 0.96) | 0.02   |
| 6.5% – 6.9%                      | Ref               |        | Ref               |        |
| 7.0% – 7.9%                      | 1.49 (1.29, 1.72) | <0.001 | 1.47 (1.20, 1.80) | <0.001 |
| 8.0% – 8.9%                      | 2.80 (2.41, 3.24) | <0.001 | 2.06 (1.64, 2.58) | <0.001 |
| 9.0% – 9.9%                      | 3.89 (3.31, 4.56) | <0.001 | 3.12 (2.46, 3.95) | 0.008  |
| ≥10%                             | 7.22 (6.27, 8.31) | <0.001 | 6.74 (5.49, 8.27) | <0.001 |
| <b>Glucose-lowering therapy</b>  |                   |        |                   |        |
| <b>No fills</b>                  | 1.16 (1.02, 1.32) | 0.02   | 1.00 (0.82, 1.23) | 0.99   |
| <b>Insulin use</b>               |                   |        |                   |        |
| Bolus ± basal                    | Ref               |        | Ref               |        |
| Basal only                       | 0.64 (0.57, 0.71) | <0.001 | 0.92 (0.79, 1.08) | 0.32   |
| Not treated with insulin         | 0.31 (0.28, 0.35) | <0.001 | 0.58 (0.49, 0.69) | <0.001 |
| <b>Non-insulin medications</b>   |                   |        |                   |        |
| Metformin                        | 0.72 (0.66, 0.78) | <0.001 | 0.79 (0.69, 0.90) | <0.001 |
| Sulfonylurea                     | 0.88 (0.81, 0.96) | 0.006  | 0.97 (0.84, 1.11) | 0.66   |
| SGLT2 inhibitor                  | 1.47 (1.27, 1.70) | <0.001 | 0.65 (0.46, 0.93) | 0.02   |
| GLP-1 receptor agonist           | 0.74 (0.64, 0.85) | <0.001 | 0.94 (0.73, 1.20) | 0.59   |
| DPP-4 inhibitor                  | 0.84 (0.75, 0.95) | 0.004  | 0.95 (0.80, 1.14) | 0.59   |
| Thiazolidinedione                | 1.18 (0.99, 1.40) | 0.07   | 0.96 (0.72, 1.28) | 0.78   |
| Other                            | 0.85 (0.60, 1.20) | 0.35   | 0.83 (0.49, 1.39) | 0.47   |

Abbreviations: COPD, chronic obstructive pulmonary disease; DKA, diabetic ketoacidosis; HHS, hyperglycemic hyperosmolar state.
